# Supplementary material
Source: Springer Nature journal article supplement (https://www.springermedizin.de/resource/supplementary/12881_2011_909_MOESM4_ESM.pdf/9451692)

### A. Loci of SNPs

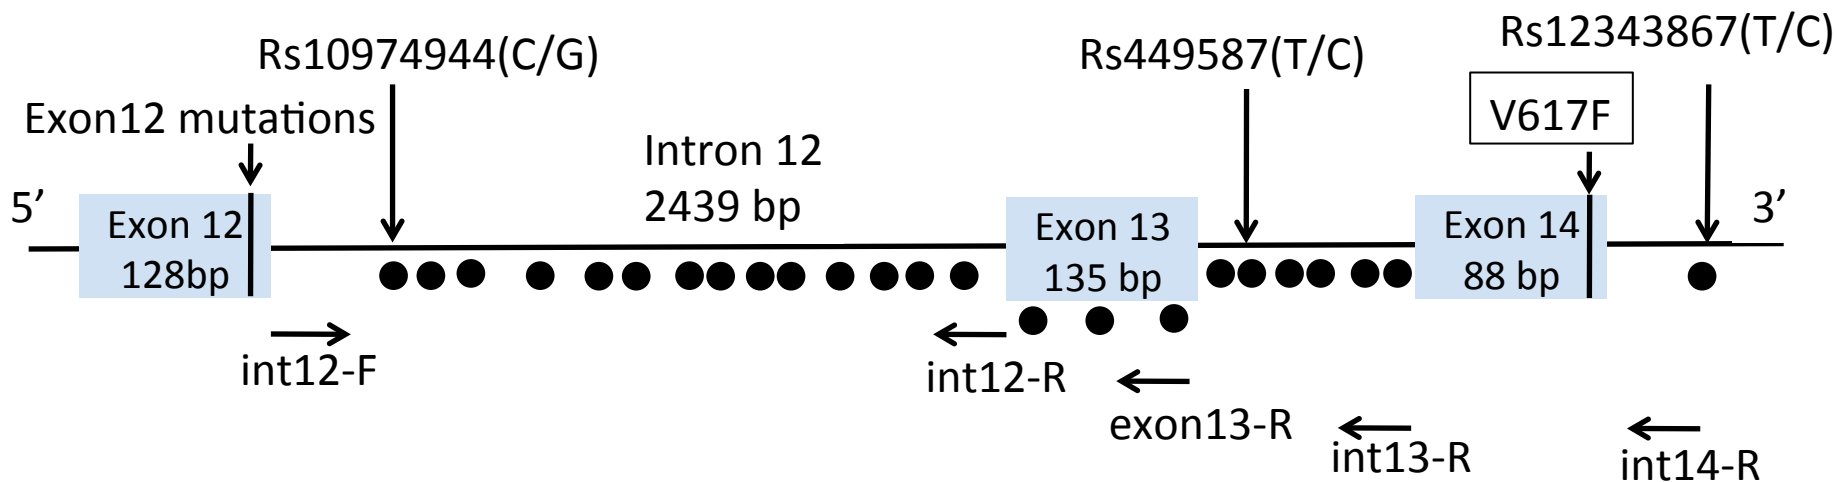

### B. Allele-specific PCR

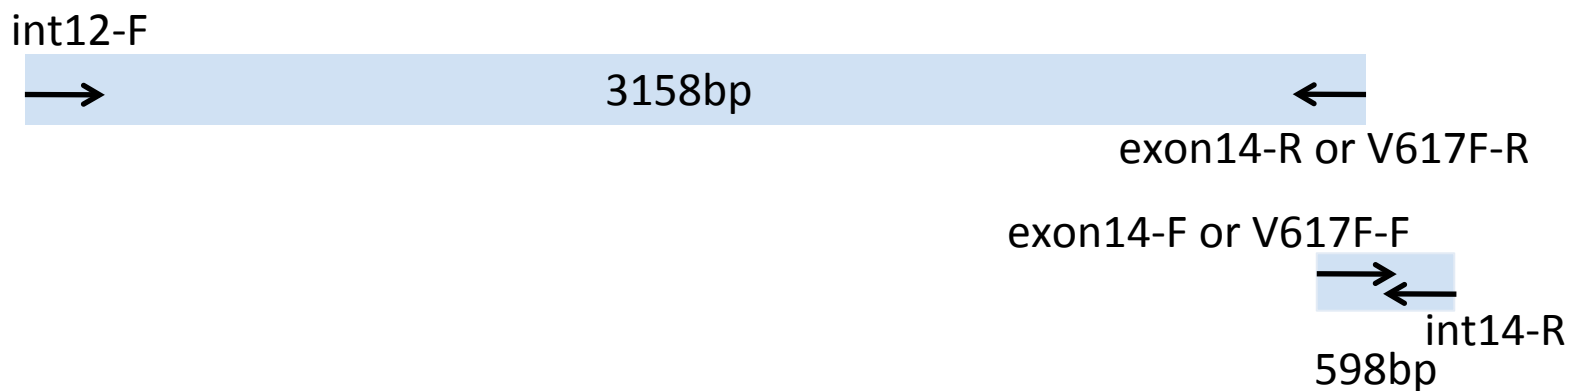

Supplement: MOESM4 [file 9451692]
